# Supplementary material for: A Comparative Study on Processed Panax ginseng Products Using HR-MAS NMR-Based Metabolomics
Source: MDPI journal article supplement (doi:10.3390/molecules25061390), 2020-03-18
Supplement: s1 [file s1]

## Supplementary Materials

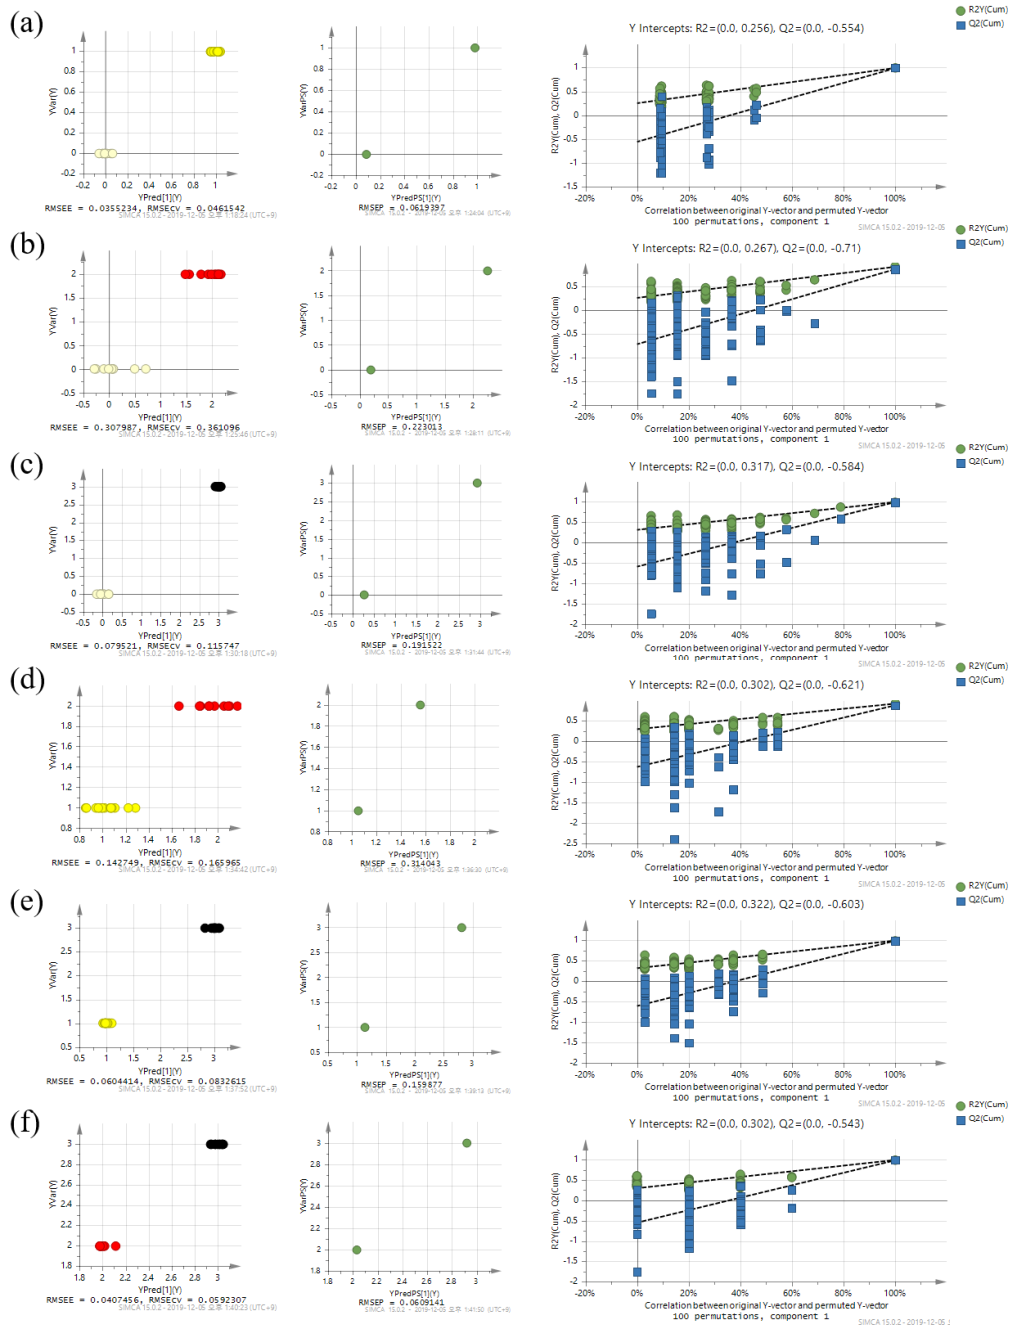

**Figure 1.** Results of OPLS model validation. (a) White ginseng vs. tae-geuk ginseng, (b) white ginseng vs. red ginseng, (c) white ginseng vs. black ginseng, (d) tae-geuk ginseng vs. red ginseng, (e) tae-geuk ginseng vs. black ginseng, (f) red ginseng vs. black ginseng.
